# Supplementary material
Source: PubMed Central journal article supplement (PMC3194965)

Figure S1

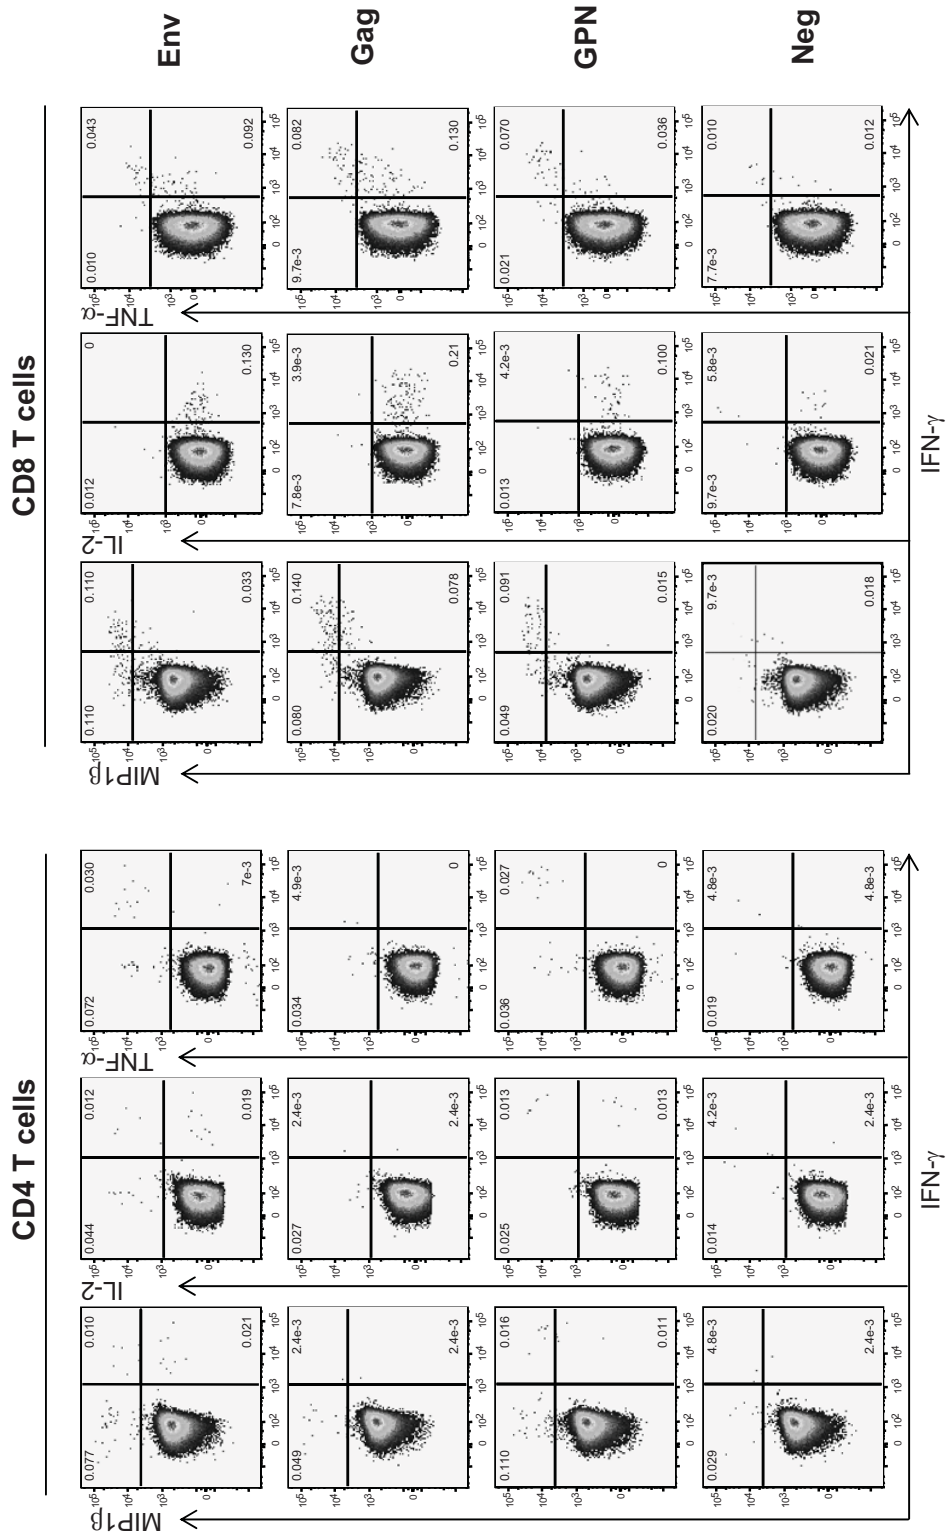

Supplement: supp_85_21_11468__1.pdf [file supp_85_21_11468__1.pdf]

Figure S2

A

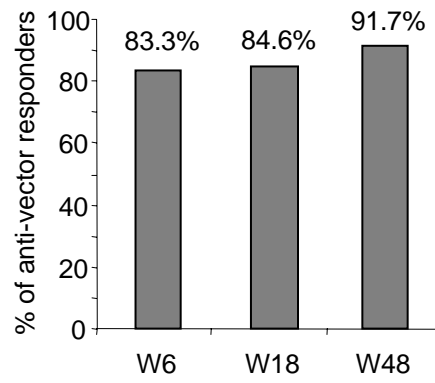

B

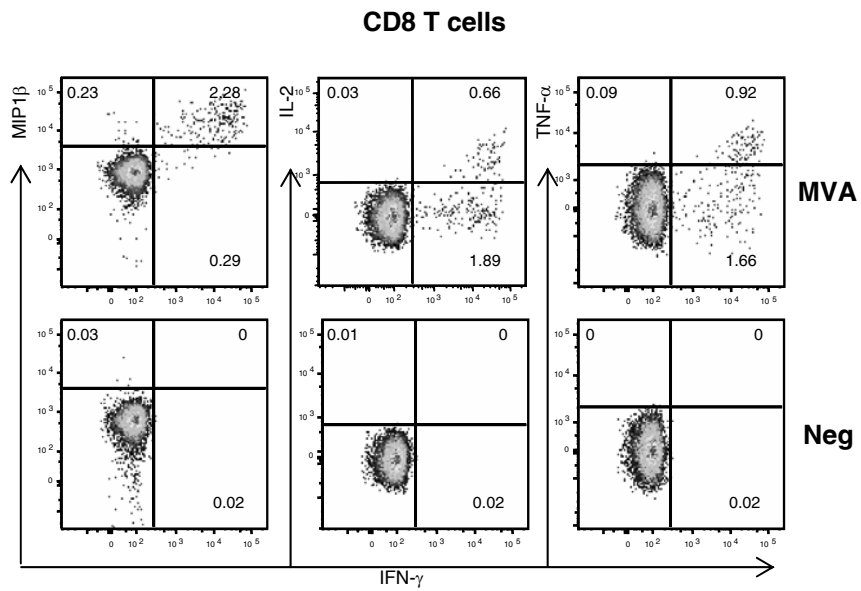

C

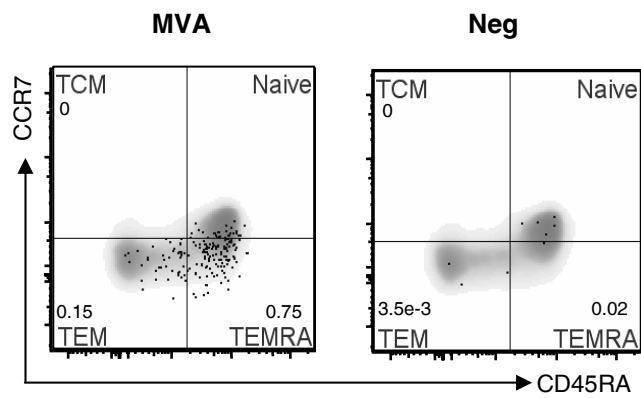

Supplement: supp_85_21_11468__2.pdf [file supp_85_21_11468__2.pdf]
